# Supplementary material
Source: PubMed Central journal article supplement (PMC2715804)
Supplement: supp_29_15_4067__1.pdf [file supp_29_15_4067__1.pdf]

Supplementary Table 1: Plasmids used in this study

| Plasmid Name | Specification                                                                                                                                                                                                                                                                                                                                                   | Reference      |
|--------------|-----------------------------------------------------------------------------------------------------------------------------------------------------------------------------------------------------------------------------------------------------------------------------------------------------------------------------------------------------------------|----------------|
| pAP599       | Plasmid for making gene deletion construct for <i>C. glabrata</i> , containing <i>URA3</i> marker and a hygromycin-resistance (Hyg <sup>R</sup> ) cassette which is flanked by FRT sites and multiple cloning sites                                                                                                                                             |                |
| pRD16        | <i>C. glabrata</i> <i>CEN/ARS</i> plasmid for expressing <i>S. cerevisiae</i> <i>FLP1</i> to recycle the Hyg <sup>R</sup> marker used for gene disruption                                                                                                                                                                                                       |                |
| pBC34.1      | Plasmid for restoring <i>URA3</i> in <i>C. glabrata</i>                                                                                                                                                                                                                                                                                                         | Domergue et al |
| pBM1         | Plasmid for placing the Hyg <sup>R</sup> cassette, flanked by FRT sites at the <i>AQY1</i> locus. <i>C. glabrata</i> <i>AQY1</i> 5' and 3' untranslated region (UTR) were amplified using primers #26, #27 and #28, #29, respectively, and subcloned into pAP599 as a <i>SpeI-BamHI</i> and a <i>HindIII-KpnI</i> fragment flanking the Hyg <sup>R</sup> marker |                |
| pBM11        | <i>TNR1</i> deletion vector: <i>C. glabrata</i> <i>TNR1</i> 5' and 3' untranslated region (UTR) were amplified using primers #1, #2 and #3, #4, respectively, and subcloned into pAP599 as a <i>SacI-BamHI</i> and a <i>HindIII-XhoI</i> fragment flanking the Hyg <sup>R</sup> marker                                                                          | This study     |
| pBM12        | <i>TNR2</i> deletion vector: <i>C. glabrata</i> <i>TNR2</i> 5' and 3' UTR were amplified using primers #1, #2 and #3, #5, respectively, and subcloned into pAP599 as a <i>SacI-BamHI</i> and a <i>HindIII-XhoI</i> flanking the Hyg <sup>R</sup> marker                                                                                                         | This study     |
| pRD35        | <i>TNA1</i> deletion vector                                                                                                                                                                                                                                                                                                                                     | Domergue et al |
| pBM13        | CAGL0G08448g deletion vector: the 5' and 3' UTR for ORF CAGL0G08448g were amplified using primers #6, #7 and #8, #9, respectively, and subcloned into pAP599 as a <i>KpnI-SalI</i> and a <i>BamHI-SacI</i> flanking the Hyg <sup>R</sup> marker                                                                                                                 | This study     |
| pRK5         | CAGL0F00209g deletion vector: the 5' and 3' UTR for ORF CAGL0F00209g were amplified using primers #18, #19, #20, #21 and subcloned into pAP599 as a <i>KpnI-SalI</i> and a <i>BamHI-SacI</i> flanking the Hyg <sup>R</sup> marker                                                                                                                               | This study     |
| pGRB2.2      | <i>CEN/ARS</i> plasmid for <i>C. glabrata</i> containing <i>URA3</i> marker and multiple cloning sites flanked by <i>S. cerevisiae</i> <i>PGK1</i> promoter and <i>HIS3</i> 3'UTR                                                                                                                                                                               | Domergue et al |
| pBM28        | Vector for restoring <i>CgTNA1</i> : the coding sequence (CDS) of <i>C. glabrata</i> <i>TNA1</i> was amplified by primers #30, #31, and subcloned into pGRB2.2 as a <i>SpeI-XhoI</i> fragment                                                                                                                                                                   | This study     |
| pBM29        | Vector for restoring <i>TNR1</i> : <i>C. glabrata</i> <i>TNR1</i> CDS was amplified by primers #32, #33, and subcloned into pGRB2.2 as a <i>SpeI-XhoI</i> fragment                                                                                                                                                                                              | This study     |
| pBM30        | Vector for restoring <i>TNR2</i> : <i>C. glabrata</i> <i>TNR2</i> CDS was amplified by primers #32, #33, and subcloned into pGRB2.2 as a <i>SpeI-XhoI</i> fragment                                                                                                                                                                                              | This study     |
| pBM31        | Vector for expressing <i>ScTNA1</i> : <i>S. cerevisiae</i> <i>TNA1</i> CDS was amplified by primers #34, #35, and subcloned into pGRB2.2 as a <i>SpeI-XhoI</i> fragment                                                                                                                                                                                         | This study     |
| pBM32        | Vector for expressing <i>ScTHI7</i> : <i>S. cerevisiae</i> <i>THI7</i> CDS was amplified by primers #40, #41, and subcloned into pGRB2.2 as a <i>XbaI-EcoRI</i> fragment                                                                                                                                                                                        | This study     |
| pBM33        | Vector for expressing <i>YOR071c</i> : <i>S. cerevisiae</i> <i>YOR071c</i> CDS was amplified by primers #36, #37, and subcloned into pGRB2.2 as a <i>XbaI-EcoRI</i> fragment                                                                                                                                                                                    | This study     |
| pBM34        | Vector for expressing <i>YOR192c</i> : <i>S. cerevisiae</i> <i>YOR192c</i> CDS was amplified by primers #38, #39, and subcloned into pGRB2.2 as a <i>XbaI-EcoRI</i> fragment                                                                                                                                                                                    | This study     |
| pAP596       | <i>SIR2</i> deletion vector                                                                                                                                                                                                                                                                                                                                     | Domergue et al |

|        |                                                                                                                                                                                                                                                                                            |                |
|--------|--------------------------------------------------------------------------------------------------------------------------------------------------------------------------------------------------------------------------------------------------------------------------------------------|----------------|
| pAP598 | <i>SIR4</i> deletion vector: <i>C. glabrata</i> <i>SIR4</i> 5' and 3' untranslated region (UTR) were amplified using primers #14, #15 and #16, #17, respectively, and subcloned into pAP599 as a <i>KpnI-HindIII</i> and a <i>BamHI-SacI</i> fragment flanking the Hyg <sup>R</sup> marker | This study     |
| pAP628 | <i>HST1</i> deletion vector                                                                                                                                                                                                                                                                | Domergue et al |
| pAP633 | <i>HST2</i> deletion vector                                                                                                                                                                                                                                                                | Domergue et al |
| pBM16  | <i>CEN/ARS</i> plasmid for <i>C. glabrata</i> containing CloneNAT-resistance marker and multiple cloning sites                                                                                                                                                                             | This study     |
| pBM17  | Vector for restoring <i>CgHST1</i> : the entire <i>C. glabrata</i> <i>HST1</i> including ~480 bp 5'UTR, CDS and ~170 bp 3'UTR was amplified by primers #42, #43, and subcloned into pBM16 as a <i>PstI-SalI</i> fragment                                                                   | This study     |
| pRD61  | <i>SUM1</i> deletion vector: <i>C. glabrata</i> <i>SUM1</i> 5' and 3' untranslated region (UTR) were amplified using primers #22, #23 and #24, #25, respectively, and subcloned into pAP599 as a <i>KpnI-XhoI</i> and a <i>NotI-SacI</i> fragment flanking the Hyg <sup>R</sup> marker     | This study     |

Supplementary Table 2: Primers used in this study

| Primer No.           | Primer Name         | Primer Sequence (5' to 3')                        |
|----------------------|---------------------|---------------------------------------------------|
| For gene disruption  |                     |                                                   |
| 1                    | THI7-5'-SacI        | cgatgagctcagaaggtgaggtgctggac                     |
| 2                    | THI7-5'-BamHI       | tctcggatccggtacgtctttattcag                       |
| 3                    | THI7-3'-HindIII     | cgacaagcttatttagcaacttgactgaag                    |
| 4                    | 13354-2-XhoI        | caagctcgagaagatcactactacggttc                     |
| 5                    | 14113-2-XhoI        | actactcgagcacttacagactctaacc                      |
| 6                    | 8448-5'-KpnI        | catggtaccgccaatggacattg                           |
| 7                    | 8448-5'-Sall        | tttgagtcgactcattgttgacggctg                       |
| 8                    | 8448-3'-BamHI       | caacggatccttgcacccaaaagcctg                       |
| 9                    | 8448-3'-SacI        | tactagagctcttcgagtcctgtaatac                      |
| 14                   | SIR4-904KpnIBsgIFW  | cggggtacctgtgcagatgtccgtagtacctaactgccc           |
| 15                   | SIR4-1HindIIIRev    | cccaagcttttttattatgagtacaacagtaggtt               |
| 16                   | SIR4+1 BamHIFW      | cgcggatcctattctaacttaatatatgcctataatc             |
| 17                   | SIR4+901SacIBsgIRev | caaggagctcttgcagtcagcaaatatcgacatattaaattcacc     |
| 18                   | OF00209g-5'-KpnI    | cggggtaccacgatctatgtgcaaccatatctcccattg           |
| 19                   | OF00209g-5'-Sall    | acgcgtcgacgctaataatggaattgatgctgctg               |
| 20                   | OF00209g-3'-BamHI   | cgggatccgaagacagatcacacacctgtgg                   |
| 21                   | OF00209g-3'-SacI    | cggagctccgaaatcgttgcctagcttacaagtgtactgatgctggcac |
| 22                   | Sum1-5fwd           | tccaagggtaccgaagattctgctatatttcacga               |
| 23                   | Sum1-5rev           | ctcgagcaatatctcgatataaccgaggtg                    |
| 24                   | Sum1-3fwd           | gcccgcctcgatatataagagctctca                       |
| 25                   | Sum1-3rev           | aaagcgagctccgataaactgctctgtgtgtg                  |
| 26                   | Aqy1-5fwd           | tggggtaccgagaagttgaggactgttcttattc                |
| 27                   | Aqy1 5rev           | agtccaagctgactaattggataatg                        |
| 28                   | Aqy1 3fwd           | tagggatcctctactcgagcaaccaaattc                    |
| 29                   | Aqy13rev            | ggactagtcaaataattgctcctcaggc                      |
| For gene restoration |                     |                                                   |
| 30                   | TNA+0FwdSpe         | gactagtatgacattaagaatgagag                        |
| 31                   | TNAStopRevXho       | ccctcagatcaatacatgtatttaaa                        |
| 32                   | THI7-ATG-SpeI       | cgtaactagtatgagaggatttaagttctc                    |
| 33                   | THI7-TGA-XhoI       | gctactcagtcataatttctgcaactccg                     |
| 34                   | ScTNA1+1-SpeI       | cgataactagtatgagcaacaaattacaatg                   |
| 35                   | ScTNA1-TAG-XhoI     | atgcctcagctaatatcatgtacttaaac                     |
| 36                   | YOR071-F            | catgtctagaatgagcttcagtagtatag                     |
| 37                   | YOR071-R            | gactgaattctcagacaactgttgag                        |
| 38                   | YOR192-F            | atcgtctagaatgagttcggtagcagaatc                    |
| 39                   | YOR192-R            | tctcgaattcttagcgaattgttttctcagggaag               |
| 40                   | YLR237-F            | ctagtctagaatgagttcggtagtaag                       |
| 41                   | YLR237-R            | agctgaattcctaagcagcttttctcaggc                    |
| 42                   | HST1-F-522          | gactctaccgtattgcac                                |
| 43                   | HST1-R+1.7k-Sal     | gcattgctgacgctctagaataatggttcagc                  |
